# Supplementary material
Source: publisher site journal article supplement (https://www.dovepress.com/article/415171)
Supplement: Supplementary file 1 [file get_supplementary_file.php]

**Table of Contents**

[**Supplementary Table 1:** Search strings and results from PubMed, Web of Science and Cochrane databases (last updated 24.02.2023) 2](#_Toc136438237)

[**Supplementary Table 2:** Post-operative biomarker predictor categories/cut-off values as applied in included studies. 4](#_Toc136438238)

[**Supplementary Table 3:** Excluded studies and reasons for exclusion. 5](#_Toc136438239)

[**Supplementary Table 4:** List of covariates adjusted for in the included studies. 10](#_Toc136438240)

[**Supplementary Table 5**: QUIPS Risk of Bias Assessment 11](#_Toc136438241)

[**PRISMA 2020 Checklist** 12](#_Toc136438242)

# **Supplementary Table 1:** Search strings and results from PubMed, Web of Science and Cochrane databases (last updated 24.02.2023)

| Database | Search string | Hits |
| --- | --- | --- |
| PubMed | 1. "postoperative period"[MeSH Terms] OR "postop*"[All Fields] OR "periop*"[All Fields] OR "postsurg*"[All Fields] OR "post-surg*"[All Fields] OR "surgery"[MeSH Subheading] OR "surg*"[All Fields] OR "surgical procedures, operative"[MeSH Terms] OR "operat*"[All Fields] OR "general surgery"[MeSH Terms] OR "general surgery"[All Fields] OR "resect*"[All Fields] | 6,870,655 |
| 1. "colorectal neoplasms"[MeSH Terms] OR "colorectal neoplasms"[All Fields] OR "colorectal cancer"[All Fields] OR "colorectal carcinoma"[All Fields] OR "colorectal tumour"[All Fields] OR "colorectal tumor"[All Fields] OR "colonic neoplasms"[MeSH Terms] OR "colonic neoplasms"[All Fields] OR "colon cancer"[All Fields] OR ("colon"[MeSH Terms] AND ("carcinoma"[MeSH Terms] OR "carcinoma"[All Fields])) OR "colon tumor"[All Fields] OR "colon tumour"[All Fields] OR "rectal neoplasms"[MeSH Terms] OR "rectal neoplasms"[All Fields] OR "rectal cancer"[All Fields] OR "rectal carcinoma"[All Fields] OR "rectal tumor"[All Fields] OR "rectal tumour"[All Fields] | 295,290 |
| 1. "inflammation"[MeSH Terms] OR "inflammatory"[All Fields] OR "inflamm*"[All Fields] OR "c-reactive protein"[MeSH Terms] OR "c-reactiv*"[All Fields] OR ("blood"[MeSH Terms] AND ("biomarkers"[MeSH Terms] OR "biomarker*"[All Fields])) OR "serum markers"[All Fields] OR ("glasgow prognostic score") OR ("gps") OR ("mgps") OR ("crp") | 1,716,477 |
| 1. "prognosis"[MeSH Terms] OR "surviv*"[All Fields] OR "survival"[MeSH Terms] OR "recurrence"[MeSH Terms] OR "recur*"[All Fields] OR "mortality"[MeSH Terms] OR "mortali*"[All Fields] OR (relapse*) OR (prognos*) OR (predict*) | 6,197,876 |
| 1. ("postoperative period"[MeSH Terms] OR "postop*"[All Fields] OR "periop*"[All Fields] OR "postsurg*"[All Fields] OR "post surg*"[All Fields] OR "surgery"[MeSH Subheading] OR "surg*"[All Fields] OR "surgical procedures, operative"[MeSH Terms] OR "operat*"[All Fields] OR "general surgery"[MeSH Terms] OR "general surgery"[All Fields] OR "resect*"[All Fields]) AND ("colorectal neoplasms"[MeSH Terms] OR "colorectal neoplasms"[All Fields] OR "colorectal cancer"[All Fields] OR "colorectal carcinoma"[All Fields] OR "colorectal tumour"[All Fields] OR "colorectal tumor"[All Fields] OR "colonic neoplasms"[MeSH Terms] OR "colonic neoplasms"[All Fields] OR "colon cancer"[All Fields] OR ("colon"[MeSH Terms] AND ("carcinoma"[MeSH Terms] OR "carcinoma"[All Fields])) OR "colon tumor"[All Fields] OR "colon tumour"[All Fields] OR "rectal neoplasms"[MeSH Terms] OR "rectal neoplasms"[All Fields] OR "rectal cancer"[All Fields] OR "rectal carcinoma"[All Fields] OR "rectal tumor"[All Fields] OR "rectal tumour"[All Fields]) AND ("inflammation"[MeSH Terms] OR "inflammatory"[All Fields] OR "inflamm*"[All Fields] OR "c-reactive protein"[MeSH Terms] OR "c reactiv*"[All Fields] OR ("blood"[MeSH Terms] AND ("biomarkers"[MeSH Terms] OR "biomarker*"[All Fields])) OR "serum markers"[All Fields] OR "glasgow prognostic score"[All Fields] OR "gps"[All Fields] OR "mgps"[All Fields] OR "crp"[All Fields]) AND ("prognosis"[MeSH Terms] OR "surviv*"[All Fields] OR "survival"[MeSH Terms] OR "recurrence"[MeSH Terms] OR "recur*"[All Fields] OR "mortality"[MeSH Terms] OR "mortali*"[All Fields] OR "relapse*"[All Fields] OR "prognos*"[All Fields] OR "predict*"[All Fields]) | **5,079** |
| Web of Science | 1. AB= (post operative OR peri operative OR surgery OR resection) | 990,666 |
| 1. TI= (colorectal OR colon OR rectal) | 256,905 |
| 1. AB= (inflammation OR systemic OR c reactive protein OR CRP) | 862,043 |
| 1. ALL= (recurrence OR prognos* OR surviv*) | 2,323,051 |
| 1. **#1 (population 1) AND #2 (population 2) AND #3 (predictor) AND #4 (outcome)** | **1,824** |
| Cochrane (CENTRAL) | 1. TIAB="post operative" OR "peri-operative" OR "surgery" OR "resection" | 300,547 |
| 1. TIAB="colorectal" OR colon OR "rectal" | 46,843 |
| 1. TIAB="inflammation" OR "C reactive protein" OR "CRP level" OR "systemic" | 117,299 |
| 1. TIAB="recurrence" OR prognos* OR "survival" | 194,701 |
| 1. **#1 (population 1) AND #2 (population 2) AND #3 (predictor) AND #4 (outcome)** | **2,339** |

# **Supplementary Table 2:** Post-operative biomarker predictor categories/cut-off values as applied in included studies.

| **Biomarker** | **Categories/cut-off values** | |
| --- | --- | --- |
| if assessed ≤ 1 week after surgery | if assessed ≥ 4 weeks after surgery |
| CRP | 150mg/L | 10mg/L |
| GPS | **0:** CRP˂150mg/L + Albumin ≥ 25g/L | **0:** CRP˂10mg/L + Albumin ≥ 35g/L |
| **1:** CRP˂150mg/L + Albumin ˂ 25g/L  OR CRP≥150mg/L + Albumin ≥ 25g/L | **1:** CRP˂10mg/L + Albumin ˂ 35g/L  OR CRP≥10mg/L + Albumin ≥ 35g/L |
| **2:** CRP≥150mg/L + Albumin ˂ 25g/L | **2:** CRP≥10mg/L + Albumin ˂ 35g/L |
| mGPS | **n. a** | **0:** CRP˂10mg/L |
| **n. a** | **1:** CRP≥10mg/L + Albumin ≥ 35g/L |
| **n. a** | **2:** CRP≥10mg/L + Albumin < 35g/L |

CRP, C-reactive protein; GPS, Glasgow Prognostic Score; mGPS, modified Glasgow Prognostic Score; n.a not applicable

# **Supplementary Table 3:** Excluded studies and reasons for exclusion.

| **Reason** | **Study** |
| --- | --- |
| Prognostic predictors were assessed pre-operatively (n=24) | 1. Chan JC, Chan DL, Diakos CI, Engel A, Pavlakis N, Gill A, et al. The Lymphocyte-to-Monocyte Ratio is a Superior Predictor of Overall Survival in Comparison to Established Biomarkers of Resectable Colorectal Cancer. Ann Surg. 2017;265(3):539-46.  2. Climent M, Ryan É J, Stakelum Á, Khaw YL, Creavin B, Lloyd A, et al. Systemic inflammatory response predicts oncological outcomes in patients undergoing elective surgery for mismatch repair-deficient colorectal cancer. Int J Colorectal Dis. 2019;34(6):1069-78.  3. Crozier J, McKee R, McArdle C, Angerson W, Anderson J, Horgan P, et al. The presence of a systemic inflammatory response predicts poorer survival in patients receiving adjuvant 5-FU chemotherapy following potentially curative resection for colorectal cancer. BRITISH JOURNAL OF CANCER. 2006;94(12):1833-6.  4. Dolan RD, Almasaudi AS, Dieu LB, Horgan PG, McSorley ST, McMillan DC. The relationship between computed tomography-derived body composition, systemic inflammatory response, and survival in patients undergoing surgery for colorectal cancer. J Cachexia Sarcopenia Muscle. 2019;10(1):111-22.  5. Inamoto S, Kawada K, Okamura R, Hida K, Sakai Y. Prognostic impact of the combination of neutrophil-to-lymphocyte ratio and Glasgow prognostic score in colorectal cancer: a retrospective cohort study. Int J Colorectal Dis. 2019;34(7):1303-15.  6. Ishikawa S, Miyoshi N, Fujino S, Ogino T, Takahashi H, Uemura M, et al. Validation of the conventional Glasgow Prognostic Score and development of the improved Glasgow Prognostic Score in patients with stage 0-III colorectal cancer after curative resection. Ann Gastroent Surg. 2021;5(3):345-53.  7. Ishizuka M, Nagata H, Takagi K, Iwasaki Y, Kubota K. Inflammation-based prognostic system predicts postoperative survival of colorectal cancer patients with a normal preoperative serum level of carcinoembryonic antigen. Ann Surg Oncol. 2012;19(11):3422-31.  8. Ishizuka M, Nagata H, Takagi K, Iwasaki Y, Shibuya N, Kubota K. Clinical Significance of Tumor Pathology for Postoperative Survival of Patients Undergoing Surgery for Stage IV Colorectal Cancer. ANTICANCER RESEARCH. 2012;32(8):3291-7.  9. Kamei Y, Takayama T, Suzuki T, Furihata K, Otsuki M, Sadahiro S. Prediction of Recurrence in Patients with Stage III Colon Cancer Using Conventional Clinicopathological Factors and Peripheral Blood Test Data: A New Analysis with Artificial Intelligence. Oncology-Basel. 2021;99(5):318-26.  10. Lee SC, Huh JW, Lee WY, Yun SH, Kim HC, Cho YB, et al. Prognostic value of serum inflammatory markers in colorectal cancer. Int J Colorectal Dis. 2020;35(7):1211-9.  11. McMillan DC, Crozier JE, Canna K, Angerson WJ, McArdle CS. Evaluation of an inflammation-based prognostic score (GPS) in patients undergoing resection for colon and rectal cancer. Int J Colorectal Dis. 2007;22(8):881-6.  12. Moug SJ, McColl G, Lloyd SM, Wilson G, Saldanha JD, Diament RH. Comparison of positive lymph node ratio with an inflammation-based prognostic score in colorectal cancer. Brit J Surg. 2011;98(2):282-6.  13. Nozoe T, Kono M, Kuma S, Tsujita E, Ohga T. New scoring system to create a prognostic criteria in colorectal carcinoma based on serum elevation of C-reactive protein and decrease in lymphocyte in peripheral blood. J Med Invest. 2019;66(3.4):264-8.  14. Park JH, Fuglestad AJ, Køstner AH, Oliwa A, Graham J, Horgan PG, et al. Systemic Inflammation and Outcome in 2295 Patients with Stage I-III Colorectal Cancer from Scotland and Norway: First Results from the ScotScan Colorectal Cancer Group. Ann Surg Oncol. 2020;27(8):2784-94.  15. Richards CH, Leitch EF, Horgan PG, Anderson JH, McKee RF, McMillan DC. The relationship between patient physiology, the systemic inflammatory response and survival in patients undergoing curative resection of colorectal cancer. Br J Cancer. 2010;103(9):1356-61.  16. Richards CH, Roxburgh CS, Anderson JH, McKee RF, Foulis AK, Horgan PG, et al. Prognostic value of tumour necrosis and host inflammatory responses in colorectal cancer. Br J Surg. 2012;99(2):287-94.  17. Roxburgh CS, Platt JJ, Leitch EF, Kinsella J, Horgan PG, McMillan DC. Relationship between preoperative comorbidity, systemic inflammatory response, and survival in patients undergoing curative resection for colorectal cancer. Ann Surg Oncol. 2011;18(4):997-1005.  18. Sokolov M, Angelov K, Vasileva M, Atanasova MP, Vlahova A, Todorov G. Clinical and prognostic significance of pathological and inflammatory markers in the surgical treatment of locally advanced colorectal cancer. Oncotargets Ther. 2015;8:2329-37.  19. Sugimoto K, Komiyama H, Kojima Y, Goto M, Tomiki Y, Sakamoto K. Glasgow prognostic score as a prognostic factor in patients undergoing curative surgery for colorectal cancer. Dig Surg. 2012;29(6):503-9.  20. Suzuki S, Akiyoshi T, Oba K, Otsuka F, Tominaga T, Nagasaki T, et al. Comprehensive Comparative Analysis of Prognostic Value of Systemic Inflammatory Biomarkers for Patients with Stage II/III Colon Cancer. Ann Surg Oncol. 2020;27(3):844-52.  21. Tamai K, Okamura S, Makino S, Yamamura N, Fukuchi N, Ebisui C, et al. C-reactive protein/albumin ratio predicts survival after curative surgery in elderly patients with colorectal cancer. Updates Surg.  22. Tokunaga R, Sakamoto Y, Nakagawa S, Izumi D, Kosumi K, Taki K, et al. Comparison of systemic inflammatory and nutritional scores in colorectal cancer patients who underwent potentially curative resection. Int J Clin Oncol. 2017;22(4):740-8.  23. Wang F, He W, Jiang C, Guo G, Ke B, Dai Q, et al. Prognostic value of inflammation-based scores in patients receiving radical resection for colorectal cancer. BMC Cancer. 2018;18(1):1102.  24. Yamamoto M, Saito H, Hara K, Sugezawa K, Uejima C, Tanio A, et al. Combination of C-reactive Protein and Monocyte Count Is a Useful Prognostic Indicator for Patients With Colorectal Cancer. In Vivo. 2020;34(1):299-305. |
| Survival outcomes of interest were not reported (n=10) | 1. Crockett SD, Mott LA, Barry EL, Figueiredo JC, Burke CA, Baxter GJ, et al. C-reactive protein and risk of colorectal adenomas or serrated polyps: a prospective study. Cancer Prev Res (Phila). 2014;7(11):1122-7.  2. Huang Y, Lou XY, Zhu YX, Wang YC, Zhang L, Liu HL, et al. Local environment in biopsy better predict the pathological response to neoadjuvant chemoradiotherapy in rectal cancer. Bioscience Rep. 2019;39.  3. Leung KL, Lai PB, Ho RL, Meng WC, Yiu RY, Lee JF, et al. Systemic cytokine response after laparoscopic-assisted resection of rectosigmoid carcinoma: A prospective randomized trial. Ann Surg. 2000;231(4):506-11.  4. Man WH, Lin HJ, Liu Z, Jin L, Wang J, Zhang J, et al. Usefulness of Inflammation-Based Prognostic Scores for Predicting the Risk of Complications After Radical Resection of Colorectal Carcinoma. Cancer Manag Res. 2020;12:1029-38.  5. McSorley ST, Roxburgh CSD, Horgan PG, McMillan DC. The relationship between cardiopulmonary exercise test variables, the systemic inflammatory response, and complications following surgery for colorectal cancer. Perioper Med-London. 2018;7.  6. Mik M, Dziki L, Berut M, Trzcinski R, Dziki A. Neutrophil to Lymphocyte Ratio and C-Reactive Protein as Two Predictive Tools of Anastomotic Leak in Colorectal Cancer Open Surgery. Dig Surg. 2018;35(1):77-84.  7. Plas M, de Haan JJ, van der Wal-Huisman H, Rutgers A, Absalom AR, de Bock GH, et al. The systemic impact of a surgical procedure in older oncological patients. Eur J Surg Oncol. 2019;45(8):1403-9.  8. Plas M, Rutgers A, van der Wal-Huisman H, de Haan JJ, Absalom AR, de Bock GH, et al. The association between the inflammatory response to surgery and postoperative complications in older patients with cancer; a prospective prognostic factor study. J Geriatr Oncol. 2020;11(5):873-9.  9. Tsimogiannis KE, Telis K, Tselepis A, Pappas-Gogos GK, Tsimoyiannis EC, Basdanis G. Α-defensin expression of inflammatory response in open and laparoscopic colectomy for colorectal cancer. World J Surg. 2011;35(8):1911‐7.  10. Watt DG, Ramanathan ML, McSorley ST, Walley K, Park JH, Horgan PG, et al. Clinicopathological Determinants of an Elevated Systemic Inflammatory Response Following Elective Potentially Curative Resection for Colorectal Cancer. Ann Surg Oncol. 2017;24(9):2588-94. |
| Prognostic predictor of interest not reported (n=32) | 1. Allaix ME, Rebecchi F, Famiglietti F, Arolf S, Arezzo A, Morino M. Long-term oncologic outcomes following anastomotic leak after anterior resection for rectal cancer: does the leak severity matter? Surg Endosc. 2020;34(9):4166-76.  2. Almasaudi AS, Dolan RD, Edwards CA, McMillan DC. Hypoalbuminemia Reflects Nutritional Risk, Body Composition and Systemic Inflammation and Is Independently Associated with Survival in Patients with Colorectal Cancer. Cancers. 2020;12(7).  3. Almasaudi AS, McSorley ST, Dolan RD, Edwards CA, McMillan DC. The relation between Malnutrition Universal Screening Tool (MUST), computed tomography-derived body composition, systemic inflammation, and clinical outcomes in patients undergoing surgery for colorectal cancer. Am J Clin Nutr. 2019;110(6):1327-34.  4. Bockelman C, Beilmann-Lehtonen I, Kaprio T, Koskensalo S, Tervahartiala T, Mustonen H, et al. Serum MMP-8 and TIMP-1 predict prognosis in colorectal cancer. BMC CANCER. 2018;18.  5. Byström P, Berglund Å, Nygren P, Wernroth L, Johansson B, Larsson A, et al. Evaluation of predictive markers for patients with advanced colorectal cancer. Acta Oncol. 2012;51(7):849-59.  6. Canna K, McMillan DC, McKee RF, McNicol AM, Horgan PG, McArdle CS. Evaluation of a cumulative prognostic score based on the systemic inflammatory response in patients undergoing potentially curative surgery for colorectal cancer. Br J Cancer. 2004;90(9):1707-9.  7. Catena F, Ansaloni L, Avanzolini A, Di Saverio S, D'Alessandro L, Casadei MM, et al. Systemic cytokine response after emergency and elective surgery for colorectal carcinoma. INTERNATIONAL JOURNAL OF COLORECTAL DISEASE. 2009;24(7):803-8.  8. Chen QQ, Wu HH, Guo XW, Gu K, Wang WJ, Chen XC, et al. The Change of Systemic Immune-Inflammation Index Independently Predicts Survival of Colorectal Cancer Patients after Curative Resection. MEDIATORS OF INFLAMMATION. 2020;2020.  9. Cho JS, Kim NY, Shim JK, Jun JH, Lee S, Kwak YL. The immunomodulatory effect of ketamine in colorectal cancer surgery: a randomized-controlled trial. Can J Anaesth. 2021;68(5):683-92.  10. Duvillard L, Ortega-Deballon P, Bourredjem A, Scherrer ML, Mantion G, Delhorme JB, et al. A case-control study of pre-operative levels of serum neutrophil gelatinase-associated lipocalin and other potential inflammatory markers in colorectal cancer. BMC CANCER. 2014;14.  11. Enblad M, Ghanipour L, Cashin PH. Prognostic scores for colorectal cancer with peritoneal metastases treated with cytoreductive surgery and hyperthermic intraperitoneal chemotherapy. Int J Hyperther. 2018;34(8):1390-5.  12. Fujino S, Myoshi N, Saso K, Sasaki M, Ishikawa S, Takahashi Y, et al. The inflammation-nutrition score supports the prognostic prediction of the TNM stage for colorectal cancer patients after curative resection. Surg Today. 2020;50(2):163-70.  13. Gustafsson UO, Oppelstrup H, Thorell A, Nygren J, Ljungqvist O. Adherence to the ERAS protocol is Associated with 5-Year Survival After Colorectal Cancer Surgery: A Retrospective Cohort Study. World J Surg. 2016;40(7):1741-7.  14. He WZ, Xie QK, Hu WM, Kong PF, Yang L, Yang YZ, et al. An increased number of negative lymph nodes is associated with a higher immune response and longer survival in colon cancer patients. Cancer Manag Res. 2018;10:1597-604.  15. Hong TT, Shen D, Chen XP, Wu XH, Hua D. Preoperative plasma fibrinogen, but not D-dimer might represent a prognostic factor in non-metastatic colorectal cancer: A prospective cohort study. Cancer Biomark. 2017;19(1):103-11.  16. Huang LX, Liu JG, Huang XL, Wei CY, Mo XW, Zhong HG, et al. Serum C-Reactive Protein-to-Body Mass Index Ratio Predicts Overall Survival in Patients With Resected Colorectal Cancer. Technol Cancer Res T. 2021;20.  17. Huang Q, Cao YH, Wang SY, Zhu R. Creation of a Novel Inflammation-Based Score for Operable Colorectal Cancer Patients. JOURNAL OF INFLAMMATION RESEARCH. 2020;13:659-71.  18. Ide S, Toiyama Y, Okugawa Y, Shimura T, Fujikawa H, Hiro J, et al. High platelet × C-reactive protein level multiplier is a negative prognostic marker in rectal cancer treated by neoadjuvant chemoradiotherapy. Int J Clin Oncol. 2021;26(4):708-16.  19. Ishizuka M, Nagata H, Takagi K, Iwasaki Y, Shibuya N, Kubota K. Clinical Significance of the C-Reactive Protein to Albumin Ratio for Survival After Surgery for Colorectal Cancer. Ann Surg Oncol. 2016;23(3):900-7.  20. Katoh H, Yamashita K, Wang G, Sato T, Nakamura T, Watanabe M. Anastomotic leakage contributes to the risk for systemic recurrence in stage II colorectal cancer. J Gastrointest Surg. 2011;15(1):120-9.  21. Lee S, Song A, Eo W. Serum Ferritin as a Prognostic Biomarker for Survival in Relapsed or Refractory Metastatic Colorectal Cancer. J Cancer. 2016;7(8):957-64.  22. Li XY, Yao S, He YT, Ke SQ, Ma YF, Lu P, et al. Inflammation-Immunity-Nutrition Score: A Novel Prognostic Score for Patients with Resectable Colorectal Cancer. JOURNAL OF INFLAMMATION RESEARCH. 2021;14:4577-88.  23. Matsuoka H, Ando K, Hu Q, Zaitsu Y, Tsuda Y, Hisamatsu Y, et al. Postoperative C-reactive protein/albumin ratio is a biomarker of risk of recurrence and need for adjuvant chemotherapy for stage III colorectal cancer. Int J Clin Oncol. 2020;25(7):1318-26.  24. Meng YS, Long CY, Huang XL, Huang LHY, Liao LX, Tang WZ, et al. Prognostic role and clinical significance of C-reactive protein-lymphocyte ratio in colorectal cancer. Bioengineered. 2021;12(1):5138-48.  25. Okugawa Y, Toiyama Y, Fujikawa H, Kawamura M, Yasuda H, Yokoe T, et al. Cumulative perioperative lymphocyte/C-reactive protein ratio as a predictor of the long-term outcomes of patients with colorectal cancer. Surg Today.  26. Paik KY, Lee IK, Lee YS, Sung NY, Kwon TS. Clinical Implications of Systemic Inflammatory Response Markers as Independent Prognostic Factors in Colorectal Cancer Patients. CANCER RESEARCH AND TREATMENT. 2014;46(1):65-73.  27. Platt JJ, Ramanathan ML, Crosbie RA, Anderson JH, McKee RF, Horgan PG, et al. C-reactive Protein as a Predictor of Postoperative Infective Complications after Curative Resection in Patients with Colorectal Cancer. ANNALS OF SURGICAL ONCOLOGY. 2012;19(13):4168-77.  28. Sato R, Oikawa M, Kakita T, Okada T, Abe T, Yazawa T, et al. The prognostic value of the prognostic nutritional index and inflammation-based markers in obstructive colorectal cancer. Surg Today. 2020;50(10):1272-81.  29. Vaughan-Shaw PG, Zgaga L, Ooi LY, Theodoratou E, Timofeeva M, Svinti V, et al. Low plasma vitamin D is associated with adverse colorectal cancer survival after surgical resection, independent of systemic inflammatory response. Gut. 2020;69(1):103-+.  30. Xie H, Yuan G, Huang S, Kuang J, Yan L, Ruan G, et al. The prognostic value of combined tumor markers and systemic immune-inflammation index in colorectal cancer patients. Langenbecks Arch Surg. 2020;405(8):1119-30.  31. Xu Y, Liang F, Chen Y, Wang Z, Zhong H, Tang W. Novel model to predict the prognosis of patients with stage II-III colon cancer. Biomed Res Int. 2020;2020.  32. Yoneyama Y, Ito M, Sugitou M, Kobayashi A, Nishizawa Y, Saito N. Postoperative lymphocyte percentage influences the long-term disease-free survival following a resection for colorectal carcinoma. Jpn J Clin Oncol. 2011;41(3):343-7. |
| Non-surgical treatment for colorectal cancer (n=4) | 1. Nakagawa K, Tanaka K, Nojiri K, Kumamoto T, Takeda K, Ueda M, et al. The modified Glasgow prognostic score as a predictor of survival after hepatectomy for colorectal liver metastases. Ann Surg Oncol. 2014;21(5):1711-8.  2. Peltonen R, Gramkow MH, Dehlendorff C, Osterlund PJ, Johansen JS, Isoniemi H. Elevated serum YKL-40, IL-6, CRP, CEA, and CA19-9 combined as a prognostic biomarker panel after resection of colorectal liver metastases. PLoS One. 2020;15(8):e0236569.  3. Shibutani M, Kimura K, Kashiwagi S, Wang EN, Okazaki Y, Maeda K, et al. Elevated Postoperative Levels of Serum C-reactive Protein Are Associated With Shorter Long-term Survival After Resection of Colorectal Liver Metastases, Regardless of the Occurrence of Infectious Complications. Anticancer Res. 2021;41(5):2605-10.  4. Shibutani M, Nagahara H, Fukuoka T, Iseki Y, Hirakawa K, Ohira M. Efficacy of Adjuvant Chemotherapy According to the Classification of Recurrence Risk Based on Systemic Inflammatory Markers in Patients With Liver Metastases of Colorectal Cancer. Anticancer Res. 2019;39(9):5039-45. |
| Review (n=1) | 1. Yamamoto T, Kawada K, Obama K. Inflammation-Related Biomarkers for the Prediction of Prognosis in Colorectal Cancer Patients. Int J Mol Sci. 2021;22(15). |
| Correspondence letter (n=1) | 1. Redmond HP. Systemic inflammatory response predicts survival following curative resection of colorectal cancer (Br J Surg 2003; 90: 215-219). Br J Surg. 2003;90(7):889; author reply |

# **Supplementary Table 4:** List of covariates adjusted for in the included studies.

| **First author, Year, Reference** | **Covariates adjusted for** |
| --- | --- |
| Wigmore, 200127 | Age, sex, albumin concentration, Dukes' stage |
| McMillan, 200320 | Age, Dukes stage |
| Crozier, 200729 | None |
| Leitch, 200730 | Age, sex, TNM stage, white blood cell count |
| Guthrie, 201331 | None |
| Shibutani, 201535 | None |
| McSorley, 201632 | Age, sex, BMI, TNM stage, co-morbidities, smoking status, neoadjuvant/adjuvant therapy use, Clavien Dindo grade |
| Watt, 201733 | None |
| Yamamoto, 201836 | Sex, tumor size, tumor invasion depth, metastasis, surgical approach, infectious complications |
| Zhou, 201837 | Age, sex, TNM stage, differentiation, circumferential resection margin status, perineural invasion, neoadjuvant therapy, postoperative adjunctive therapy |
| Matsubara, 201938 | Age, sex, BMI, TNM stage, tumor site and size, neoadjuvant use, surgical complications, CEA levels. |
| Hermunen, 202041 | Age, sex, inflammatory disease, TNM stage |
| McSorley, 202034 | None |
| Osterman, 202042 | Age, sex, comorbidities, surgical procedure, TNM grade, adjuvant treatment. |
| Son, 202021 | None |
| Hua, 202140 | Age, sex, TNM stage, BMI, smoking status, use of NSAIDs, plasma storage time, years between diagnosis and blood draw |
| Lehtomäki, 202143 | Age, sex, inflammatory disease, TNM stage, chemotherapy regimen |
| Li, 202139 | None |
| Wesselink, 202144 | Age, sex, BMI, TNM stage, smoking status, cohort, season of blood collection |

BMI - Body Mass Index; TNM - Tumor, Node, Metastases; CEA - Carcinoembryonic antigen; NSAIDs - nonsteroidal anti-inflammatory drugs.

# **Supplementary Table 5**: QUIPS Risk of Bias Assessment

| **First author, year, ref** | **Study participation** | **Study attrition** | **Prognostic factor measurement** | **Outcome measurement** | **Study confounders** | **Statistical analysis and reporting** |
| --- | --- | --- | --- | --- | --- | --- |
| Wigmore, 200127 | Low | Low | Moderate | Low | Low | Low |
| McMillan, 200320 | Low | Low | Low | Low | Low | Low |
| Crozier, 200729 | Low | Low | Moderate | Low | Low | Low |
| Leitch, 200730 | Low | Low | Low | Low | Low | Low |
| Guthrie, 201331 | Low | Low | Low | Low | Low | Low |
| Shibutani, 201535 | Low | Low | Low | Low | High | Low |
| McSorley, 201632 | Low | Low | Low | Low | Low | Low |
| Watt, 201733 | Low | Low | Moderate | Low | High | Low |
| Yamamoto, 201836 | Low | Low | Moderate | Low | High | Moderate |
| Zhou, 201837 | Low | Moderate | Low | Low | Low | Low |
| Matsubara, 201938 | Low | Low | Low | Low | Low | Low |
| Hermunen, 202041 | Low | Moderate | Low | Low | Low | Low |
| McSorley, 202034 | Low | Low | Low | Low | Low | Low |
| Osterman, 202042 | Low | Low | Low | Low | Low | Low |
| Son, 202021 | Low | Low | Low | Low | High | Low |
| Hua, 202140 | Low | Low | Low | Low | Low | Low |
| Lehtomäki, 202143 | Low | Moderate | Low | Low | Low | Low |
| Li, 202139 | Low | Low | Low | Low | High | Low |
| Wesselink, 202144 | Low | Low | Low | Low | Low | Low |

# **PRISMA 2020 Checklist**

| **Section and Topic** | **Item #** | **Checklist item** | **Location where item is reported** |
| --- | --- | --- | --- |
| **TITLE** | | |  |
| Title | 1 | Identify the report as a systematic review. | Title |
| **ABSTRACT** | | |  |
| Abstract | 2 | See the PRISMA 2020 for Abstracts checklist. | Abstract |
| **INTRODUCTION** | | |  |
| Rationale | 3 | Describe the rationale for the review in the context of existing knowledge. | Page 2- 3 |
| Objectives | 4 | Provide an explicit statement of the objective(s) or question(s) the review addresses. | Page 3, line 21 |
| **METHODS** | | |  |
| Eligibility criteria | 5 | Specify the inclusion and exclusion criteria for the review and how studies were grouped for the syntheses. | Page 4, para 2 |
| Information sources | 6 | Specify all databases, registers, websites, organisations, reference lists and other sources searched or consulted to identify studies. Specify the date when each source was last searched or consulted. | Page 4, para 3 |
| Search strategy | 7 | Present the full search strategies for all databases, registers and websites, including any filters and limits used. | Fig 1 & Supplementary Table 1 |
| Selection process | 8 | Specify the methods used to decide whether a study met the inclusion criteria of the review, including how many reviewers screened each record and each report retrieved, whether they worked independently, and if applicable, details of automation tools used in the process. | Page 4, para 2 |
| Data collection process | 9 | Specify the methods used to collect data from reports, including how many reviewers collected data from each report, whether they worked independently, any processes for obtaining or confirming data from study investigators, and if applicable, details of automation tools used in the process. | Page 4, para 4 & Page 5, para 1 |
| Data items | 10a | List and define all outcomes for which data were sought. Specify whether all results that were compatible with each outcome domain in each study were sought (e.g. for all measures, time points, analyses), and if not, the methods used to decide which results to collect. | Page 4, para 2 |
| 10b | List and define all other variables for which data were sought (e.g. participant and intervention characteristics, funding sources). Describe any assumptions made about any missing or unclear information. | Page 4, para 2 |
| Study risk of bias assessment | 11 | Specify the methods used to assess risk of bias in the included studies, including details of the tool(s) used, how many reviewers assessed each study and whether they worked independently, and if applicable, details of automation tools used in the process. | Page 5, para 2 |
| Effect measures | 12 | Specify for each outcome the effect measure(s) (e.g. risk ratio, mean difference) used in the synthesis or presentation of results. | Page 5, para 3 |
| Synthesis methods | 13a | Describe the processes used to decide which studies were eligible for each synthesis (e.g. tabulating the study intervention characteristics and comparing against the planned groups for each synthesis (item #5)). | Page 5, para 3 & supp table 2 |
| 13b | Describe any methods required to prepare the data for presentation or synthesis, such as handling of missing summary statistics, or data conversions. | Page 5, para 3 |
| 13c | Describe any methods used to tabulate or visually display results of individual studies and syntheses. | Page 5, para 3 |
| 13d | Describe any methods used to synthesize results and provide a rationale for the choice(s). If meta-analysis was performed, describe the model(s), method(s) to identify the presence and extent of statistical heterogeneity, and software package(s) used. | Page 5, para 3 |
| 13e | Describe any methods used to explore possible causes of heterogeneity among study results (e.g. subgroup analysis, meta-regression). | Page 5, para 3 |
| 13f | Describe any sensitivity analyses conducted to assess robustness of the synthesized results. | Page 5, para 3 |
| Reporting bias assessment | 14 | Describe any methods used to assess risk of bias due to missing results in a synthesis (arising from reporting biases). | Supp table 5 |
| Certainty assessment | 15 | Describe any methods used to assess certainty (or confidence) in the body of evidence for an outcome. | Page 5, para 3 |
| **RESULTS** | | |  |
| Study selection | 16a | Describe the results of the search and selection process, from the number of records identified in the search to the number of studies included in the review, ideally using a flow diagram. | Fig 1 |
| 16b | Cite studies that might appear to meet the inclusion criteria, but which were excluded, and explain why they were excluded. | Supp Table 3 |
| Study characteristics | 17 | Cite each included study and present its characteristics. | Table 1 |
| Risk of bias in studies | 18 | Present assessments of risk of bias for each included study. | Supp Table 5 |
| Results of individual studies | 19 | For all outcomes, present, for each study: (a) summary statistics for each group (where appropriate) and (b) an effect estimate and its precision (e.g. confidence/credible interval), ideally using structured tables or plots. | Table 1 |
| Results of syntheses | 20a | For each synthesis, briefly summarise the characteristics and risk of bias among contributing studies. | Page 6-8 |
| 20b | Present results of all statistical syntheses conducted. If meta-analysis was done, present for each the summary estimate and its precision (e.g. confidence/credible interval) and measures of statistical heterogeneity. If comparing groups, describe the direction of the effect. | Fig 2-5 |
| 20c | Present results of all investigations of possible causes of heterogeneity among study results. | Fig 2-5 |
| 20d | Present results of all sensitivity analyses conducted to assess the robustness of the synthesized results. | Fig 2-5 |
| Reporting biases | 21 | Present assessments of risk of bias due to missing results (arising from reporting biases) for each synthesis assessed. | Page 6-8 |
| Certainty of evidence | 22 | Present assessments of certainty (or confidence) in the body of evidence for each outcome assessed. | Page 6-8 |
| **DISCUSSION** | | |  |
| Discussion | 23a | Provide a general interpretation of the results in the context of other evidence. | Page 9-11 |
| 23b | Discuss any limitations of the evidence included in the review. | Page 11, para 2 |
| 23c | Discuss any limitations of the review processes used. | Page 11, para 2 |
| 23d | Discuss implications of the results for practice, policy, and future research. | Page 10-11 |
| **OTHER INFORMATION** | | |  |
| Registration and protocol | 24a | Provide registration information for the review, including register name and registration number, or state that the review was not registered. | Page 4, para 1 |
| 24b | Indicate where the review protocol can be accessed, or state that a protocol was not prepared. | PROSPERO register |
| 24c | Describe and explain any amendments to information provided at registration or in the protocol. | Title was amended to include the phrase “C-reactive protein-based” |
| Support | 25 | Describe sources of financial or non-financial support for the review, and the role of the funders or sponsors in the review. | Page 14 |
| Competing interests | 26 | Declare any competing interests of review authors. | Page 14 |
| Availability of data, code and other materials | 27 | Report which of the following are publicly available and where they can be found: template data collection forms; data extracted from included studies; data used for all analyses; analytic code; any other materials used in the review. | Page 14 |

*From:*  Page MJ, McKenzie JE, Bossuyt PM, Boutron I, Hoffmann TC, Mulrow CD, et al. The PRISMA 2020 statement: an updated guideline for reporting systematic reviews. BMJ 2021;372:n71. doi: 10.1136/bmj.n71

For more information, visit: <http://www.prisma-statement.org/>
